# Supplementary material
Source: MDPI journal article supplement (https://www.mdpi.com/2410-3888/8/3/160)
Supplement: s1 [file s1]

# Supplementary Materials: Age and Growth of the Threatened Smalleye Round Ray, *Urotrygon microphthalmum*, Delsman, 1941, from Northeastern Brazil

Jones Santander-Neto, Francisco Marcante Santana, Jonas Eloi de Vasconcelos-Filho and Rosângela Lessa

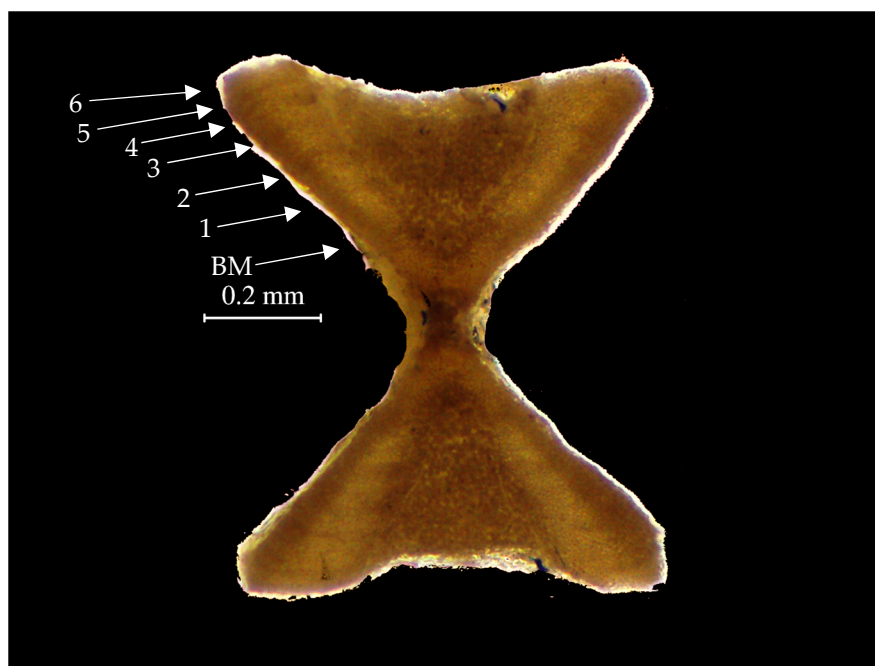

**Figure S1.** Band pairs formed on the sectioned vertebrae of *Urotrygon microphthalmum*. BM, birthmark.

**Table S1.** Kruskal-Wallis test/post-hoc de Dunn from grouped sexes between months of *Urotrygon microphthalmum*.

| Comparisons        | Z        | P        | P.adj    |
|--------------------|----------|----------|----------|
| February-January   | −1.74991 | 0.040067 | 0.040067 |
| January - March    | 2.025666 | 0.0214   | 0.0214   |
| January - May      | 2.157036 | 0.015501 | 0.015501 |
| January - July     | 2.408825 | 0.008002 | 0.008002 |
| January - November | 2.893308 | 0.001906 | 0.001906 |
| February - October | −1.71108 | 0.043533 | 0.043533 |
| March - September  | −1.68954 | 0.045558 | 0.045558 |
| March - October    | −2.08558 | 0.018508 | 0.018508 |
| May - September    | −2.00748 | 0.022349 | 0.022349 |
| May - October      | −2.08028 | 0.01875  | 0.01875  |

|                      |          |          |          |
|----------------------|----------|----------|----------|
| July - September     | -2.01887 | 0.02175  | 0.02175  |
| July - October       | -2.51805 | 0.0059   | 0.0059   |
| November - September | -2.42923 | 0.007565 | 0.007565 |
| November - October   | -3.06952 | 0.001072 | 0.001072 |

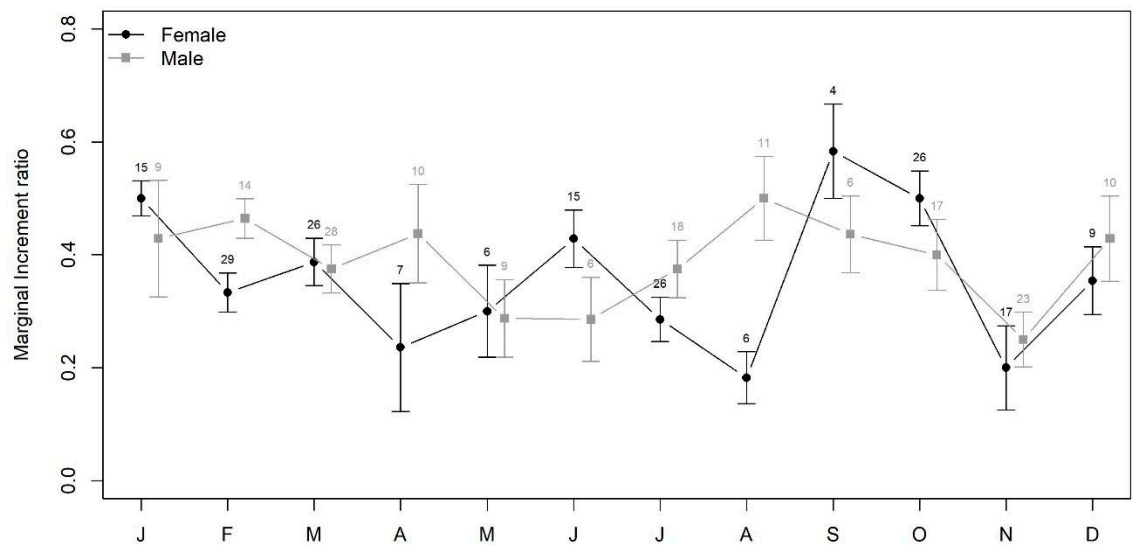

Figure S2. IMR median between months for male and female of *Urotrygon microphthalmum*.

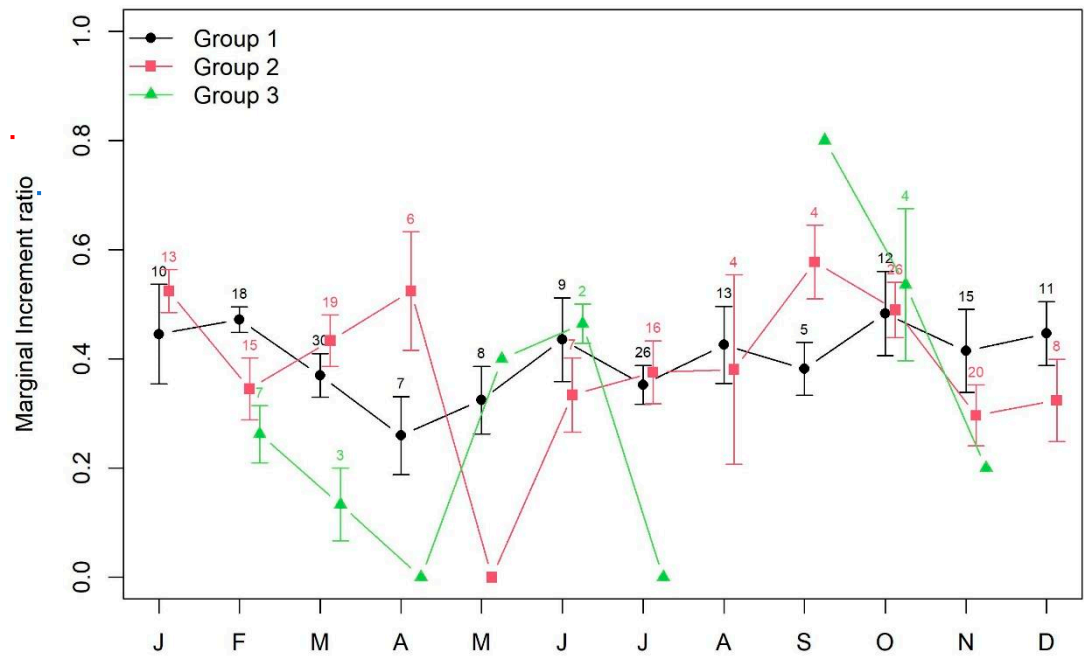

Figure S3. IMR between months for both sexes of *Urotrygon microphthalmum*. G1: 2-4 bands; G2: 5-7 bands; G3: 8-9 bands.

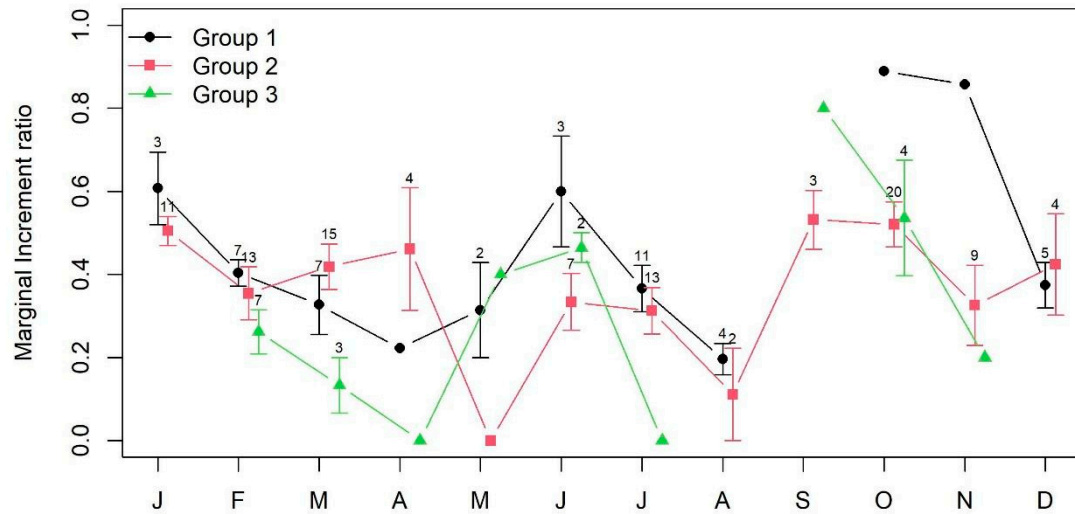

**Figure S4.** IMR between months for females of *Urotrygon microphthalmum*. G1: 2-4 bands; G2: 5-7 bands; G3: 8-9 bands.

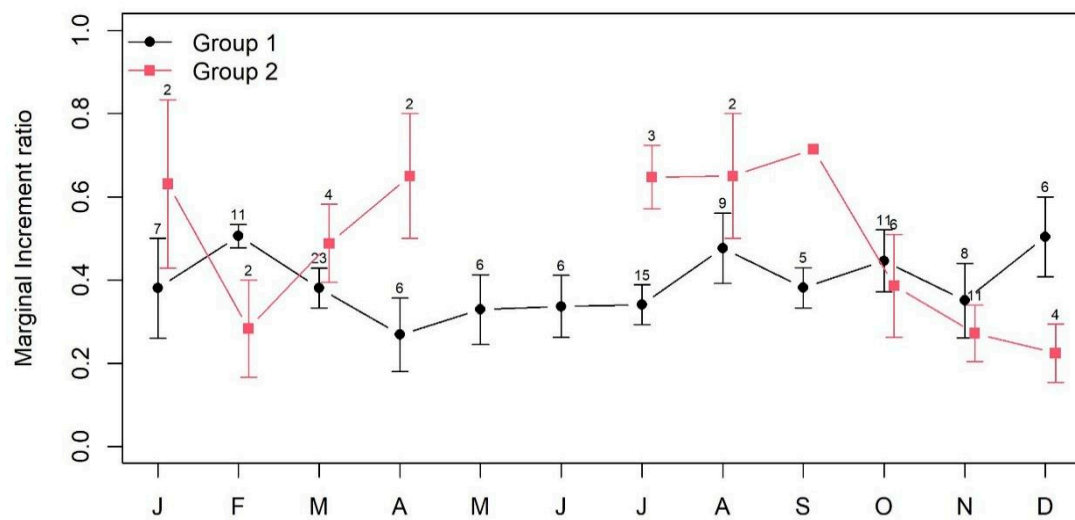

**Figure S5.** IMR between months for males of *Urotrygon microphthalmum*. G1: 2-4 bands; G2: 5-7.

**Table S2.** AIC from growth models for grouped sexes of *Urotrygon microphthalmum*.

| Modnames | K | AICc    | Delta_AICc | ModelLik | AICcWt | LL       | Cum.Wt |
|----------|---|---------|------------|----------|--------|----------|--------|
| VBGM1    | 4 | 2927,79 | 0,00       | 1,00     | 0,86   | -1459,84 | 0,86   |
| Gomp1    | 4 | 2933,58 | 5,79       | 0,06     | 0,05   | -1462,73 | 0,90   |
| Gomp2    | 4 | 2933,59 | 5,80       | 0,05     | 0,05   | -1462,74 | 0,95   |
| Log2     | 4 | 2933,65 | 5,86       | 0,05     | 0,05   | -1462,77 | 1,00   |
| VBGM2    | 4 | 2939,13 | 11,34      | 0,00     | 0,00   | -1465,51 | 1,00   |
| Log1     | 4 | 2941,89 | 14,10      | 0,00     | 0,00   | -1466,89 | 1,00   |
